# Supplementary material for: Water Cycle Acceleration in Czechia: A Water Budget Approach
Source: Copernicus journal article supplement (doi:10.5194/hess-2023-129), 2023-06-20
Supplement: Supplementary file [file hess-2023-129-AC2-supplement.pdf]

## Reply to Reviewer 2

This article presents extensive work on comparing the performance of different datasets on the closure degree of the water budget and demonstrates the acceleration in the hydrological cycle over Czechia. Overall, the paper is well written and readable and provides direct evidence of the performance on evaluation from different datasets. However, the title of the article could probably be rephrased, as it looks like a new method for demonstrating water cycle acceleration, but the actual story of the article is more about comparing the performance of different datasets using a novel method. Here are several issues needed to be addressed or clarified, which are listed as follows.

We thank the reviewer for their encouraging feedback and detailed comments. The empirical ranking framework we propose is our original approach. However, the focus of our work is to assess how different data sets portray different stories. While often there are similarities between data sets specially at coarser scales, in reality, each data sets depicts a different scenario. We will change the manuscript title from: "Water Cycle Acceleration in Czechia: A Water Budget Approach"

To: "Water Cycle Changes in Czechia: A Multi-Source Water Budget Perspective"

In the following, we provide detailed replies to all comments and discuss changes to the main manuscript.

### Major comments:

Line 12: What does the median space pattern mean here? Why only mention spring and summer here?

To add further detail and clarity the text will be rephrased from: "Interestingly, the most significant temporal changes in Czechia take place during spring, while median spatial patterns stem from summer changes in the water cycle."

To: "Interestingly, the most significant temporal changes in Czechia occur during spring, while the spatial pattern of the change in median values stems from summer changes in the water cycle, which are the seasons within the months with statistically significant changes."

Line 17-21: A more logical organization is needed, perhaps adding a sentence in front of "on the one hand" to introduce the relationship between the water cycle and water fluxes you have chosen here (precipitation, evapotranspiration. . .). The information behind "on the one hand" and "on the other hand" are not parallel associations, and these two aspects are less relevant to the focus of this article.

For clarity and brevity the text will be rephrased from: "On the one hand, small changes in total precipitation suggest a shift in precipitation towards more intense and less frequent events [Trenberth, 2011]. On the other hand, it was hypothesized that an increased vertical gradient of atmospheric water vapor would offset atmospheric wind convergence in the tropics making wet regions wetter and dry regions drier [Held and Soden, 2006]."

To: "It was hypothesized that an increased vertical gradient of atmospheric water vapor would offset atmospheric wind convergence in the tropics making wet regions wetter and dry regions drier [Held and Soden, 2006]."

Line 36-43: The information in parentheses may be summarized in a supplementary table and moved the table to supplementary materials for detailed clarification. In addition, please add the datasets categories (which ones belong to satellites or ground-based measurements, or climate models) in the table.

As suggested the information will be added as supplementary tables (Table S1, S2, S3, S4, and S5) in a formatting compatible with revised Table 1.

**Table S1.** Compiled from Sahoo et al. [2011].  $P$  is precipitation,  $E$  is evapotranspiration,  $Q$  is runoff, and  $\Delta$  TWS is changes in total water storage.

| Name        | Variable     | Spatial Resolution | Temporal Resolution | Record Length | Data Type       | Reference(s)                                           |
|-------------|--------------|--------------------|---------------------|---------------|-----------------|--------------------------------------------------------|
| GPCP        | $P$          | 1°                 | Daily               | 1997-2006     | Satellite-based | Adler et al. [2003]                                    |
| TMPA 3B42RT | $P$          | 0.25°              | 3h                  | 1997-2019     | Satellite-based | Huffman et al. [2007]                                  |
| CMORPH      | $P$          | 8km                | 30min               | 2003-2006     | Satellite-based | Joyce et al. [2004]                                    |
| PERSIANN    | $P$          | 0.25°              | 3h                  | 2000-2006     | Satellite-based | Hong et al. [2004]                                     |
| CPC PRECL   | $P$          | 2.5°               | Monthly             | 1950-Present  | Gauge-based     | Chen et al. [2002]                                     |
| CRU TS3.0   | $P$          | 0.5°               | Monthly             | 1901-2006     | Gauge-based     | Mitchell and Jones [2005]                              |
| WM v2.01    | $P$          | 0.5°               | Monthly             | 1900-2008     | Gauge-based     | Willmott and Matsuura [2001]                           |
| GPCC        | $P$          | 0.5°               | Monthly             | 1900-2007     | Gauge-based     | Schneider et al. [2011]                                |
| PM (ISCCP)  | $E$          | 2.5°               | 3h                  | 1984-2005     | Satellite-based | Sheffield et al. [2010]                                |
| PM (EOS)    | $E$          | 5km                | Daily               | 2003-2006     | Satellite-based | Vinukollu et al. [2011]                                |
| PT (EOS)    | $E$          | 5km                | Daily               | 2003-2006     | Satellite-based | Vinukollu et al. [2011]                                |
| SEBS (EOS)  | $E$          | 5km                | Daily               | 2003-2006     | Satellite-based | Vinukollu et al. [2011]                                |
| VIC         | $E$          | 1.0°               | 3h                  | 1948-2006     | Model           | Sheffield and Wood [2007]                              |
| ERA-interim | $E$          | T255               | 12h                 | 1989-2006     | Reanalysis      | Simmons [2006]                                         |
| GRACE       | $\Delta$ TWS | Basin              | ~Monthly            | 2002-2006     | Satellite-based | Swenson and Wahr [2006]                                |
| GRDC        | $Q$          | Basin              | Monthly             | 1900-2006     | Station         | <a href="http://www.bafg.de/GRDC">www.bafg.de/GRDC</a> |

**Table S2.** Compiled from Pan et al. [2012].  $P$  is precipitation,  $E$  is evapotranspiration,  $Q$  is runoff, and  $\Delta$  TWS is changes in total water storage.

| Name       | Variable     | Spatial Resolution | Temporal Resolution | Record Length | Data Type        | Reference(s)                 |
|------------|--------------|--------------------|---------------------|---------------|------------------|------------------------------|
| GPCP v2.2  | $P$          | 2.5°               | Monthly             | 1950-Present  | Gauge-based      | Adler et al. [2003]          |
| CRU TS3.0  | $P$          | 0.5°               | Monthly             | 1901-2006     | Gauge-based      | Mitchell and Jones [2005]    |
| WM v2.01   | $P$          | 0.5°               | Monthly             | 1900-2008     | Gauge-based      | Willmott and Matsuura [2001] |
| GPCC       | $P$          | 0.5°               | Monthly             | 1900-2007     | Gauge-based      | Schneider et al. [2011]      |
| MPI        | $E$          | 0.5°               | Monthly             | 1982-2008     | Flux tower-based | Jung et al. [2010]           |
| SEBS (EOS) | $E$          | 5km                | Daily               | 2003-2006     | Satellite-based  | Vinukollu et al. [2011]      |
| GRACE      | $\Delta$ TWS | Basin              | ~Monthly            | 2002-2006     | Satellite-based  | Swenson and Wahr [2006]      |
| GRDC       | $Q$          | Basin              | Monthly             | 1900-2006     | Station          | www.bafg.de/GRDC             |

**Table S3.** Compiled from Rodell et al. [2015].  $P$  is precipitation,  $E$  is evapotranspiration,  $Q$  is runoff, and  $\Delta$  TWS is changes in total water storage.

| Name                            | Variable     | Spatial Resolution | Temporal Resolution | Record Length | Data Type       | Reference(s)                                                             |
|---------------------------------|--------------|--------------------|---------------------|---------------|-----------------|--------------------------------------------------------------------------|
| GPCP v2.2                       | $P$          | 1°                 | Daily               | 1997-2006     | Satellite-based | Adler et al. [2003]; Huffman et al. [2009]                               |
| Princeton ET                    | $E$          | 5km                | Daily               | 2003-2006     | Satellite-based | Vinukollu et al. [2011]                                                  |
| MERRA and MERRA-Land            | $E$          | 0.5°x0.667°        | Hourly              | 1980-2016     | Reanalysis      | Rienecker et al. [2011]; Bosilovich et al. [2011]; Reichle et al. [2011] |
| GLDAS                           | $E$          | 0.25°              | 3h                  | 1948-2014     | Model           | Roderick et al. [2014]                                                   |
| University of Washington runoff | $Q$          | 2°                 | Monthly             | 1998-2008     | Model           | Jung et al. [2010]                                                       |
| GRACE                           | $\Delta$ TWS | Basin              | ~Monthly            | 2002-2006     | Satellite-based | Swenson and Wahr [2006]                                                  |

**Table S4.** Compiled from Zhang et al. [2016].  $P$  is precipitation,  $E$  is evapotranspiration,  $Q$  is runoff, and  $\Delta$  TWS is changes in total water storage.

| Name          | Variable     | Spatial Resolution | Temporal Resolution | Record Length | Data Type       | Reference(s)                    |
|---------------|--------------|--------------------|---------------------|---------------|-----------------|---------------------------------|
| CSU           | $P$          | 0.25°              | 3h                  | 1998–2010     | Satellite-based | Bythway and Kummerow [2013]     |
| PGF           | $P$          | 0.25°              | 3h                  | 1948–2010     | Satellite-based | Sheffield et al. [2006]         |
| CHIRPS        | $P$          | 0.5°               | Monthly             | 1981–present  | Satellite-based | Funk et al. [2014]              |
| GPCC(v6)      | $P$          | 0.5°               | Monthly             | 1901–2010     | Gauge-based     | Schneider et al. [2014]         |
| TMPA-RT       | $P$          | 0.25°              | Monthly             | 2001–2019     | Satellite-based | Huffman et al. [2007, 2010]     |
| SRB-PGF-PM    | $E$          | 0.5°               | 3h                  | 1984–2007     | Satellite-based | Vinukollu et al. [2011]         |
| VIC           | $E$          | 0.25°              | 3h                  | 1948–2010     | Model           | Sheffield and Wood [2007]       |
| ERA-interim   | $E$          | T255               | 12h                 | 1989–2006     | Reanalysis      | Simmons [2006]                  |
| MERRA         | $E$          | 0.5°x0.667°        | Hourly              | 1980–2016     | Reanalysis      | Rienecker et al. [2011]         |
| GLEAM         | $E$          | 0.5°               | 3h                  | 1984–2017     | Satellite-based | Gonzalez Miralles et al. [2011] |
| SRB-CFSR-SEBS | $E$          | 0.5°               | Daily               | 1984–2007     | Satellite-based | Vinukollu et al. [2011]         |
| SRB-CFSR-PM   | $E$          | 0.5°               | Daily               | 1984–2007     | Satellite-based | Vinukollu et al. [2011]         |
| SRB-CFSR-PT   | $E$          | 0.5°               | Daily               | 1984–2007     | Satellite-based | Vinukollu et al. [2011]         |
| VIC           | $Q$          | 0.25°              | 3h                  | 1948–2010     | Model           | Sheffield and Wood [2007]       |
| VIC           | $\Delta$ TWS | 0.25°              | 3h                  | 1948–2010     | Model           | Sheffield and Wood [2007]       |
| GRACE         | $\Delta$ TWS | 1°                 | Monthly             | 2002–present  | Satellite-based | Landerer and Swenson [2012]     |

**Table S5.** Compiled from Mumier and Aires [2018].  $P$  is precipitation,  $E$  is evapotranspiration,  $Q$  is runoff, and  $\Delta$  TWS is changes in total water storage.

| Name   | Variable     | Spatial Resolution | Temporal Resolution | Record Length | Data Type       | Reference(s)                                                                  |
|--------|--------------|--------------------|---------------------|---------------|-----------------|-------------------------------------------------------------------------------|
| TMPA   | $P$          | 0.25°              | Monthly             | 1998-2019     | Satellite-based | Huffman et al. [2007]                                                         |
| CMORPH | $P$          | 0.25°              | Daily               | 1998–present  | Satellite-based | Sheffield et al. [2006]                                                       |
| NRL    | $P$          | 0.25°              | 12h                 | 2003–2010     | Satellite-based | Turk et al. [2010]                                                            |
| GPCP   | $P$          | 2.5°               | Monthly             | 1979–present  | Satellite-based | Schneider et al. [2014]                                                       |
| GLEAM  | $E$          | 0.25°              | 3h                  | 1980–2011     | Satellite-based | Gonzalez Miralles et al. [2011]                                               |
| MOD16  | $E$          | 1km                | 8-day               | 2000–2012     | Satellite-based | Mu et al. [2007]                                                              |
| NTSG   | $E$          | 8km                | Daily               | 1983–2006     | Satellite-based | Zhang et al. [2010]                                                           |
| CSR    | $\Delta$ TWS | Basin              | Monthly             | 2002-present  | Satellite-based | <a href="http://grace.jpl.nasa.gov/data/">http://grace.jpl.nasa.gov/data/</a> |
| GFZ    | $\Delta$ TWS | Basin              | Monthly             | 2002-present  | Satellite-based | <a href="http://grace.jpl.nasa.gov/data/">http://grace.jpl.nasa.gov/data/</a> |
| JPL    | $\Delta$ TWS | Basin              | Monthly             | 2002-present  | Satellite-based | <a href="http://grace.jpl.nasa.gov/data/">http://grace.jpl.nasa.gov/data/</a> |
| GRGS   | $\Delta$ TWS | Basin              | Monthly             | 2002-present  | Satellite-based | <a href="http://grgs.obs-mip.fr/grace/">http://grgs.obs-mip.fr/grace/</a>     |
| GRDC   | $Q$          | Basin              | Monthly             | 1900-present  | Station         | <a href="http://www.grdc.sr.unh.edu/">http://www.grdc.sr.unh.edu/</a>         |

Table 1: Add the datasets categories (which ones belong to satellites or ground-based measurements or climate models) in table 1.

Table 1 will be revised as follows:



**Table 1.** Data set description.  $P$  is precipitation,  $E$  is evapotranspiration, and  $Q$  is runoff.

| Name         | Variable(s) | Spatial Resolution | Temporal Resolution | Record Length | Data Type   | Reference                                                 |
|--------------|-------------|--------------------|---------------------|---------------|-------------|-----------------------------------------------------------|
| CHMI         | $P$         | Point              | Daily               | 1961-2020     | Stations    | <a href="http://portal.chmi.cz">http://portal.chmi.cz</a> |
| CRU TS v4.06 | $P$         | 1°                 | Monthly             | 1901-2020     | Gauge-based | Harris et al. [2020]                                      |
| E-OBS        | $P$         | 0.125°             | Daily               | 1950-2020     | Gauge-based | Cornes et al. [2018]                                      |
| ERA5-Land    | $P, E, Q$   | 0.1°               | Monthly             | 1950-2020     | Reanalysis  | Muñoz-Sabater et al. [2021]                               |
| GRDC         | $Q$         | Point              | Daily               | 1921-2017     | Stations    | <a href="http://www.bafg.de/GRDC">www.bafg.de/GRDC</a>    |
| mHM          | $E, Q$      | 0.125°             | Daily               | 1950-2020     | Model       | Samaniego et al. [2010]                                   |
| NCEP/NCAR R1 | $P, E, Q$   | T62                | Monthly             | 1948-2020     | Reanalysis  | Kalnay et al. [1996]                                      |
| PREC/L       | $P$         | 0.5°               | Monthly             | 1948-2020     | Gauge-based | Chen et al. [2002]                                        |
| TerraClimate | $P, E, Q$   | 4 km               | Monthly             | 1958-2020     | Model       | Abatzoglou et al. [2018]                                  |

Line 173: Are there any supporting references to this similar approach? If yes, please provide the citations.

To the best of our knowledge there are no references for a similar approach. This is our proposed equation.

Line 180: It is okay to use the medians for excluding the outliers, but can you provide a supported plot to show the distribution of values as supplementary material?

Instead of adding a supplementary figure, Figure 4 will be revised from a histogram to a box plot. In the revised Figure 5 it can be seen that outliers are present only in the latter period (i.e., 1991-2020).

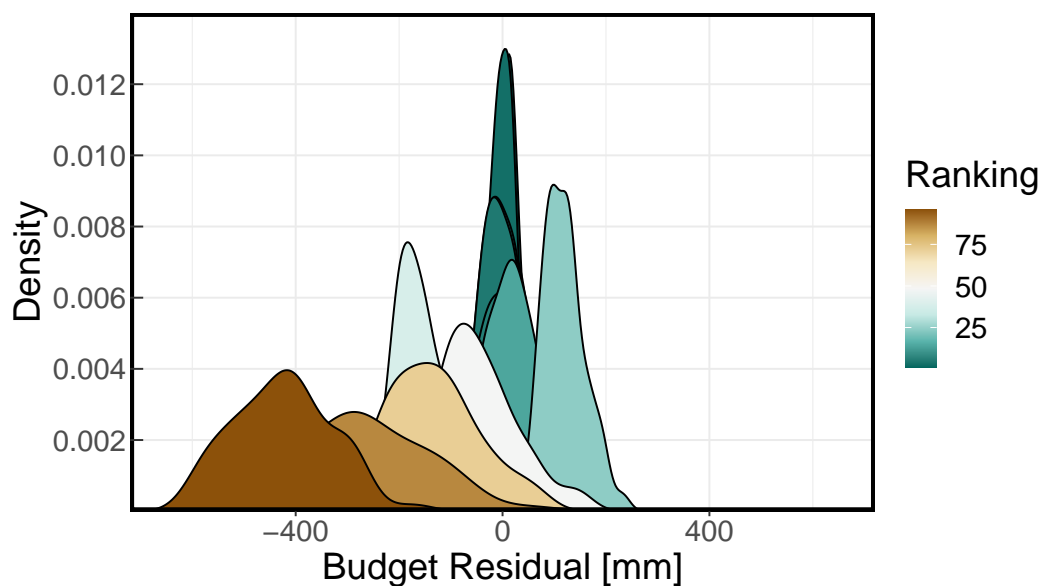

**Figure 5.** Box plots of spatial weighted average annual water fluxes over Czechia, where  $P$  is precipitation,  $E$  is evapotranspiration,  $Q$  is runoff, and  $P - E$  is precipitation minus evapotranspiration. Data are divided into two 30-year periods: 1961-1990 (blue) and 1991-2020 (yellow). Note that outliers are present only in the latter period (i.e., 1991-2020) as expected from the recorded severe drought of 2003.

Line 196-197: The demonstration is on the edge, as it is not all time is overestimated and underestimated, only in some certain period.

It is true that overestimation or underestimation are not present at every single time step. The statements referred to the overall discrepancies as quantified by the 1981-2020 average. The text will be updated to reflect the revised evaluation values (see second major comment from Reviewer 1), also for clarity the text will be rephrased from: "mHM has the highest correlation for runoff, with R-squared circa 0.86 (Figure 2c), falling to the second highest for evapotranspiration (R-squared 0.7; Figure 2c). Interestingly, the values for the 30-year average in mHM underestimates runoff (Figure 2c) but overestimates evapotranspiration (Figure 2b)."

To: "mHM has the highest correlation for runoff, with R-squared circa 0.93 (Figure 2c)."

Figure 4: Can you use the line plot to show the trend as this is a time series for changes in hydrological variables, while a histogram may not be very straightforward?

The intent of the figure is to show the change between two climate normals, not the overall trend. Thus, the figure will be revised into a box plot not a line plot (Figure 5 above on reply to comment "Line 180").

Figure 7-9: When you discuss the spatial distributions in different parts of Czechia maybe just focus on the one figure which is most representative as I see the spatial patterns are similar across Figure 7-9 and moved the rest figures to supplementary materials.

Figure 7 (now Figure 8) will be kept in the main manuscript and Figures 8 and 9 will be in the supplementary as Figure S3 and S4, respectively.

**Minor comments:**

Nine datasets? But in Table 1 there are ten datasets, right?

Nine data sets indeed. Table 1 will be revised and data type will be added (see major comment on Table 1)

Figure 5: Is it possible to zoom in on the y-axis limit because the boxes in the second and third rows are not clear?

The y-axis was modified as suggested:

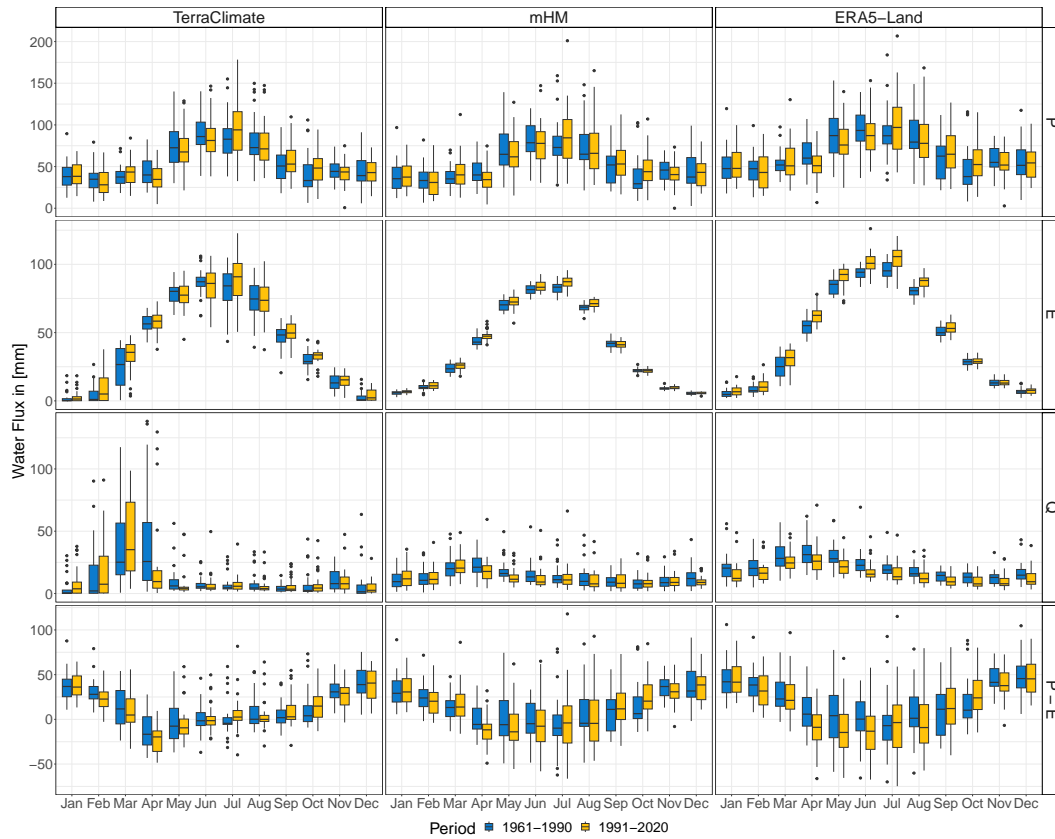

**Figure 6.** Box plot of spatial weighted average monthly water fluxes over Czechia, where  $P$  is precipitation,  $E$  is evapotranspiration,  $Q$  is runoff, and  $P - E$  is precipitation minus evapotranspiration. Data are divided into two 30-year periods: 1961-1990 (blue) and 1991-2020 (yellow). Left column: TerraClimate ( $P$ ), TerraClimate ( $E$ ), and TerraClimate ( $Q$ ). Middle column: mHM(E-OBS) ( $P$ ), mHM ( $E$ ), and mHM ( $Q$ ). Right column: ERA5-Land ( $P$ ), ERA5-Land ( $E$ ), and ERA5-Land ( $Q$ ).

## References

- Abatzoglou JT, Dobrowski SZ, Parks SA, Hegewisch KC (2018) TerraClimate, a high-resolution global dataset of monthly climate and climatic water balance from 1958–2015. *Scientific Data* 5(1):170191, DOI 10.1038/sdata.2017.191, number: 1 Publisher: Nature Publishing Group
- Adler RF, Huffman GJ, Chang A, Ferraro R, Xie PP, Janowiak J, Rudolf B, Schneider U, Curtis S, Bolvin D (2003) The version-2 global precipitation climatology project (GPCP) monthly precipitation analysis (1979–present). *Journal of hydrometeorology* 4(6):1147–1167
- Bosilovich MG, Robertson FR, Chen J (2011) Global energy and water budgets in MERRA. *Journal of Climate* 24(22):5721–5739
- Bytheway JL, Kummerow CD (2013) Inferring the uncertainty of satellite precipitation estimates in data-sparse regions over land. *Journal of Geophysical Research: Atmospheres* 118(17):9524–9533, publisher: Wiley Online Library
- Chen M, Xie P, Janowiak JE, Arkin PA (2002) Global land precipitation: A 50-yr monthly analysis based on gauge observations. *Journal of Hydrometeorology* 3(3):249–266
- Cornes RC, van der Schrier G, van den Besselaar EJM, Jones PD (2018) An Ensemble Version of the E-OBS Temperature and Precipitation Data Sets. *Journal of Geophysical Research: Atmospheres* 123(17):9391–9409, DOI 10.1029/2017JD028200, URL <https://onlinelibrary.wiley.com/doi/abs/10.1029/2017JD028200>, eprint: <https://onlinelibrary.wiley.com/doi/pdf/10.1029/2017JD028200>
- Funk CC, Peterson PJ, Landsfeld MF, Pedreros DH, Verdin JP, Rowland JD, Romero BE, Husak GJ, Michaelsen JC, Verdin AP (2014) A quasi-global precipitation time series for drought monitoring. *US Geological Survey Data Series* 832(4):1–12
- Gonzalez Miralles D, Holmes T, De Jeu R, Gash J, Meesters A, Dolman A (2011) Global land-surface evaporation estimated from satellite-based observations. *Hydrology and Earth System Sciences* pp 453–469
- Harris I, Osborn TJ, Jones P, Lister D (2020) Version 4 of the CRU TS monthly high-resolution gridded multivariate climate dataset. *Scientific data* 7(1):1–18, publisher: Nature Publishing Group
- Held IM, Soden BJ (2006) Robust Responses of the Hydrological Cycle to Global Warming. *Journal of Climate* 19(21):5686–5699, DOI 10.1175/JCLI3990.1, publisher: American Meteorological Society Section: Journal of Climate
- Hong Y, Hsu KL, Sorooshian S, Gao X (2004) Precipitation estimation from remotely sensed imagery using an artificial neural network cloud classification system. *Journal of Applied Meteorology* 43(12):1834–1853
- Huffman GJ, Bolvin DT, Nelkin EJ, Wolff DB, Adler RF, Gu G, Hong Y, Bowman KP, Stocker EF (2007) The TRMM multisatellite precipitation analysis (TMPA): Quasi-global, multiyear, combined-sensor precipitation estimates at fine scales. *Journal of hydrometeorology* 8(1):38–55
- Huffman GJ, Adler RF, Bolvin DT, Gu G (2009) Improving the global precipitation record: GPCP version 2.1. *Geophysical Research Letters* 36(17)
- Huffman GJ, Adler RF, Bolvin DT, Nelkin EJ (2010) The TRMM multi-satellite precipitation analysis (TMPA). In: *Satellite rainfall applications for surface hydrology*, Springer, pp 3–22
- Joyce RJ, Janowiak JE, Arkin PA, Xie P (2004) CMORPH: A method that produces global precipitation estimates from passive microwave and infrared data at high spatial and temporal resolution. *Journal of hydrometeorology* 5(3):487–503
- Jung M, Reichstein M, Ciais P, Seneviratne SI, Sheffield J, Goulden ML, Bonan G, Cescatti A, Chen J, de Jeu R, Dolman AJ, Eugster W, Gerten D, Gianelle D, Gobron N, Heinke J, Kimball J, Law BE, Montagnani L, Mu Q, Mueller B, Oleson K, Papale D, Richardson AD, Rouspard O, Running S, Tomelleri E, Viovy N, Weber U, Williams C, Wood E, Zaehle S, Zhang K (2010) Recent decline in the global land evapotranspiration trend due to

- limited moisture supply. *Nature* 467(7318):951–954, DOI 10.1038/nature09396, number: 7318 Publisher: Nature Publishing Group
- Kalnay E, Kanamitsu M, Kistler R, Collins W, Deaven D, Gandin L, Iredell M, Saha S, White G, Woollen J (1996) The NCEP/NCAR 40-year reanalysis project. *Bulletin of the American meteorological Society* 77(3):437–472
- Landerer FW, Swenson S (2012) Accuracy of scaled GRACE terrestrial water storage estimates. *Water resources research* 48(4), publisher: Wiley Online Library
- Mitchell TD, Jones PD (2005) An improved method of constructing a database of monthly climate observations and associated high-resolution grids. *International Journal of Climatology: A Journal of the Royal Meteorological Society* 25(6):693–712, publisher: Wiley Online Library
- Mu Q, Heinsch FA, Zhao M, Running SW (2007) Development of a global evapotranspiration algorithm based on MODIS and global meteorology data. *Remote sensing of Environment* 111(4):519–536, publisher: Elsevier
- Munier S, Aires F (2018) A new global method of satellite dataset merging and quality characterization constrained by the terrestrial water budget. *Remote Sensing of Environment* 205:119–130, publisher: Elsevier
- Muñoz-Sabater J, Dutra E, Agustí-Panareda A, Albergel C, Arduini G, Balsamo G, Boussetta S, Choulga M, Harrigan S, Hersbach H, Martens B, Miralles DG, Piles M, Rodríguez-Fernández NJ, Zsoter E, Buontempo C, Thépaut JN (2021) ERA5-Land: a state-of-the-art global reanalysis dataset for land applications. *Earth System Science Data* 13(9):4349–4383, DOI 10.5194/essd-13-4349-2021, publisher: Copernicus GmbH
- Pan M, Sahoo AK, Troy TJ, Vinukollu RK, Sheffield J, Wood EF (2012) Multisource estimation of long-term terrestrial water budget for major global river basins. *Journal of Climate* 25(9):3191–3206
- Reichle R (2012) The MERRA-land data product (version 1.2). GMAO Off Note 3
- Rienecker MM, Suarez MJ, Gelaro R, Todling R, Bacmeister J, Liu E, Bosilovich MG, Schubert SD, Takacs L, Kim GK (2011) MERRA: NASA’s modern-era retrospective analysis for research and applications. *Journal of climate* 24(14):3624–3648
- Rodell M, Beaudoing HK, L’Ecuyer T, Olson WS, Famiglietti JS, Houser PR, Adler R, Bosilovich MG, Clayson CA, Chambers D, others (2015) The observed state of the water cycle in the early twenty-first century. *Journal of Climate* 28(21):8289–8318
- Roderick M, Sun F, Lim WH, Farquhar G (2014) A general framework for understanding the response of the water cycle to global warming over land and ocean. *Hydrology and Earth System Sciences* 18(5):1575–1589, publisher: Copernicus GmbH
- Sahoo AK, Pan M, Troy TJ, Vinukollu RK, Sheffield J, Wood EF (2011) Reconciling the global terrestrial water budget using satellite remote sensing. *Remote Sensing of Environment* 115(8):1850–1865, publisher: Elsevier
- Samaniego L, Kumar R, Attinger S (2010) Multiscale parameter regionalization of a grid-based hydrologic model at the mesoscale. *Water Resources Research* 46(5), DOI 10.1029/2008WR007327, eprint: <https://onlinelibrary.wiley.com/doi/pdf/10.1029/2008WR007327>
- Schneider U, Becker A, Finger P, Meyer-Christoffer A, Rudolf B, Ziese M (2011) GPCC full data reanalysis version 6.0 at 0.5: monthly land-surface precipitation from rain-gauges built on GTS-based and historic data. *GPCC Data Rep*, doi 10
- Schneider U, Becker A, Finger P, Meyer-Christoffer A, Ziese M, Rudolf B (2014) GPCC’s new land surface precipitation climatology based on quality-controlled in situ data and its role in quantifying the global water cycle. *Theoretical and Applied Climatology* 115(1-2):15–40, publisher: Springer
- Sheffield J, Wood EF (2007) Characteristics of global and regional drought, 1950–2000: Analysis of soil moisture data from off-line simulation of the terrestrial hydrologic cycle. *Journal of Geophysical Research: Atmospheres* 112(D17), publisher: Wiley Online Library
- Sheffield J, Goteti G, Wood EF (2006) Development of a 50-year high-resolution global dataset of meteorological forcings for land surface modeling. *Journal of climate*

19(13):3088–3111

- Sheffield J, Wood EF, Munoz-Arriola F (2010) Long-Term Regional Estimates of Evapotranspiration for Mexico Based on Downscaled ISCCP Data. *Journal of Hydrometeorology* 11(2):253–275, DOI 10.1175/2009JHM1176.1, publisher: American Meteorological Society Section: *Journal of Hydrometeorology*
- Simmons A (2006) ERA-Interim: New ECMWF reanalysis products from 1989 onwards. *ECMWF newsletter* 110:25–36
- Swenson S, Wahr J (2006) Estimating Large-Scale Precipitation Minus Evapotranspiration from GRACE Satellite Gravity Measurements. *Journal of Hydrometeorology* 7(2):252–270, DOI 10.1175/JHM478.1, publisher: American Meteorological Society Section: *Journal of Hydrometeorology*
- Trenberth KE (2011) Changes in precipitation with climate change. *Climate Research* 47(1-2):123–138
- Turk JT, Mostovoy GV, Anantharaj V (2010) The NRL-blend high resolution precipitation product and its application to land surface hydrology. In: *Satellite Rainfall Applications for Surface Hydrology*, Springer, pp 85–104
- Vinukollu RK, Wood EF, Ferguson CR, Fisher JB (2011) Global estimates of evapotranspiration for climate studies using multi-sensor remote sensing data: Evaluation of three process-based approaches. *Remote Sensing of Environment* 115(3):801–823
- Willmott CJ, Matsuura K (2001) *Terrestrial Air Temperature and Precipitation: Monthly and Annual Time Series (1950 - 1999)*. University of Delaware
- Zhang K, Kimball JS, Nemani RR, Running SW (2010) A continuous satellite-derived global record of land surface evapotranspiration from 1983 to 2006. *Water Resources Research* 46(9), publisher: Wiley Online Library
- Zhang Y, Pan M, Wood EF (2016) On creating global gridded terrestrial water budget estimates from satellite remote sensing. In: *Remote Sensing and Water Resources*, Springer, pp 59–78
